# Supplementary material
Source: PubMed Central journal article supplement (PMC5035819)
Supplement: e0eaf7bb52468c34a4128f5f7d46ab66_brain-2016-00227-File003.pdf [file e0eaf7bb52468c34a4128f5f7d46ab66_brain-2016-00227-File003.pdf]

**Table S1. Functional network anchored to left IFGop epicenter in healthy controls**

| <b>Regions (BA)</b>   | <b>Cluster (n voxels)</b> | <b>x,y,z (MNI)</b> | <b>T value</b> |
|-----------------------|---------------------------|--------------------|----------------|
| L IFGop (44)          | 10325                     | -50, 12, 22        | 36.38          |
| L IFGtr (45)          |                           | -50, 22, 24        | 22.94          |
| L Premotor cortex (6) |                           | -52, 5, 37         | 13.11          |
| L IPL (40)            |                           | -54, -36, 42       | 17.59          |
| R IFGop (44)          | 2426                      | 56, 18, 28         | 16.02          |
| R IFGtr (45)          |                           | 42, 32, 14         | 15.05          |
| R Premotor cortex (6) |                           | 48, 10, 30         | 14.61          |
| L SMA (6)             | 1513                      | -2, 10, 52         | 13.26          |
| L MFG (46)            |                           | -24, 2, 58         | 11.45          |
| R MCC (24)            |                           | 4, 16, 42          | 11.43          |
| L ITG (37)            | 773                       | -46, -54, -16      | 12.52          |
| L MTG (37)            |                           | -66, -50, -4       | 11.74          |
| L Cuneus (18)         | 565                       | 2, -82, 26         | 10.8           |
| R ITG (37)            | 416                       | 46, -60, -14       | 13.09          |
| L Caudate Nucleus     | 277                       | -14, 6, 14         | 12.67          |
| L Putamen             |                           | -22, 2, 6          | 12.63          |

BA = Brodman area; IPL = Inferior Parietal Lobule, MFG = middle Frontal gyrus, STG=superior temporal gyrus, SMA = supplementary motor area, MCC = Middle cingulate cortex, ITG = Inferior Temporal Gyrus, MTG = Middle Temporal Gyrus

**Table S2 Longitudinal gray matter changes in nvPPA**

| <b>Regions (BA)</b>   | <b>Cluster (n voxels)</b> | <b>x,y,z (MNI)</b> | <b>T value</b> |
|-----------------------|---------------------------|--------------------|----------------|
| L Premotor cortex (6) | 109441                    | -50, 2, 39         | 10.18          |
| L Broca's area (44)   |                           | -36, 13, 33        | 9.62           |
| L MFG (46)            |                           | -31, 4, 50         | 9.34           |
| L SMA (6)             |                           | -11, 13, 54        | 7.73           |
| L Putamen             |                           | -25, 6, 2          | 6.7            |
| L Insula              |                           | -31, 25, 7         | 6.3            |
| R MFG (46)            | 2293                      | 29, 5, 57          | 6.67           |
| L Angular Gyrus       | 1477                      | -43, -51, 27       | 6.02           |
| L STG (48)            |                           | -49, -45, 15       | 5.83           |
| R Broca's area (44)   | 929                       | 49, 18, 13         | 6.08           |
| R Broca's area (45)   |                           | 47, 20, 22         | 5.73           |
| L Thalamus            | 811                       | -11, -15, 3        | 6.11           |
| R ACC (32)            | 774                       | 7, 10, 29          | 6.90           |
| R MCC (24)            |                           | 7, -2, 33          | 5.69           |
| R Premotor cortex (6) | 424                       | 40, -8, 45         | 6.51           |

BA = Brodman area; MFG = middle Frontal gyrus, STG = superior temporal gyrus, ACC = Anterior cingulate cortex, MCC = Middle cingulate cortex, SMA = supplementary motor area.
